# Supplementary material for: [18F]FDG-PET/CT Radiomics for Prediction of Bone Marrow Involvement in Mantle Cell Lymphoma: A Retrospective Study in 97 Patients
Source: PubMed Central journal article supplement (PMC7281173; doi:10.3390/cancers12051138), 2020-05-02
Supplement: cancers-12-01138-s001.pdf [file cancers-12-01138-s001.pdf]

# Supplementary Materials: [18F]FDG-PET/CT Radiomics for Prediction of Bone Marrow Involvement in Mantle Cell Lymphoma: A Retrospective Study in 97 Patients

Marius E. Mayerhoefer, Christopher C. Riedl, Anita Kumar, Ahmet Dogan, Peter Gibbs, Michael Weber, Philipp B. Staber, Sandra Huicochea Castellanos and Heiko Schöder

**Table 1.** Component matrix showing the contributions of the individual radiomic features to the five principal components that formed the radiomic signature.

| Radiomic feature          | Principal Component |        |        |        |        |
|---------------------------|---------------------|--------|--------|--------|--------|
|                           | 1                   | 2      | 3      | 4      | 5      |
| SUVmean                   | 0.409               | -0.545 | 0.693  | -0.154 | 0.092  |
| SUVpeak                   | 0.319               | -0.518 | 0.769  | -0.133 | 0.061  |
| SUVmax                    | 0.272               | -0.635 | 0.700  | -0.134 | 0.021  |
| entropy                   | 0.970               | 0.173  | -0.068 | 0.067  | 0.074  |
| homogeneity               | -0.877              | 0.389  | 0.169  | -0.123 | 0.073  |
| contrast                  | 0.835               | -0.453 | -0.101 | 0.185  | -0.189 |
| angular second moment     | -0.914              | -0.207 | 0.072  | 0.072  | -0.207 |
| difference entropy        | 0.822               | -0.473 | -0.177 | 0.212  | -0.124 |
| difference variance       | 0.764               | -0.516 | -0.107 | 0.238  | -0.231 |
| correlation               | -0.084              | 0.924  | 0.203  | 0.007  | 0.131  |
| cluster prominence        | 0.513               | 0.637  | 0.358  | 0.374  | -0.075 |
| cluster shade             | -0.166              | 0.436  | 0.407  | 0.760  | 0.032  |
| measure of correlation 1  | -0.872              | 0.409  | 0.166  | -0.125 | 0.056  |
| measure of correlation 2  | 0.402               | -0.066 | -0.300 | 0.141  | 0.697  |
| inverse difference moment | 0.005               | 0.940  | 0.271  | -0.012 | -0.028 |
| maximum probability       | -0.869              | -0.182 | 0.165  | 0.251  | -0.202 |
| sum average               | 0.833               | 0.478  | 0.017  | -0.243 | -0.030 |
| sum entropy               | 0.784               | 0.594  | 0.080  | 0.032  | 0.075  |
| sum variance              | 0.814               | 0.498  | 0.065  | -0.203 | -0.074 |
| variance                  | 0.822               | 0.508  | 0.076  | -0.155 | -0.074 |
| sphericity                | -0.139              | -0.452 | 0.079  | 0.136  | 0.628  |
